# Supplementary material for: Sign inversion in magnetic circularly polarised luminescence of fused aromatics with 1.6 T N-up/S-up Faraday geometry
Source: Royal Society of Chemistry journal article supplement (doi:10.1039/d0ra09233a), 2021-01-01
Supplement: d0ra09233a1.pdf [file d0ra09233a1.pdf]

Electronic Supporting Information for

## **Sign Inversion in Magnetic Circularly Polarised Luminescence of Fused Aromatics with 1.6 T N-up/S-up Faraday Geometry**

Hayato Toda <sup>a</sup>, Nobuyuki Hara <sup>a</sup>, Michiya Fujiki <sup>b</sup> and Yoshitane Imai <sup>a\*</sup>

<sup>a</sup> Department of Applied Chemistry, Faculty of Science and Engineering, Kindai University, 3-4-1 Kowakae, Higashi-Osaka, Osaka 577-8502, Japan. E-mail: y-imai@apch.kindai.ac.jp

<sup>b</sup> Graduate School of Materials Science, Nara Institute of Science and Technology, Takayama, Ikoma, Nara 630-0192, Japan

1. UV-vis absorption spectra of NP, NP-1, NP-2, PHE, PHE-2, PHE-3, ANT, ANT-1, ANT-2, COR, and BP.

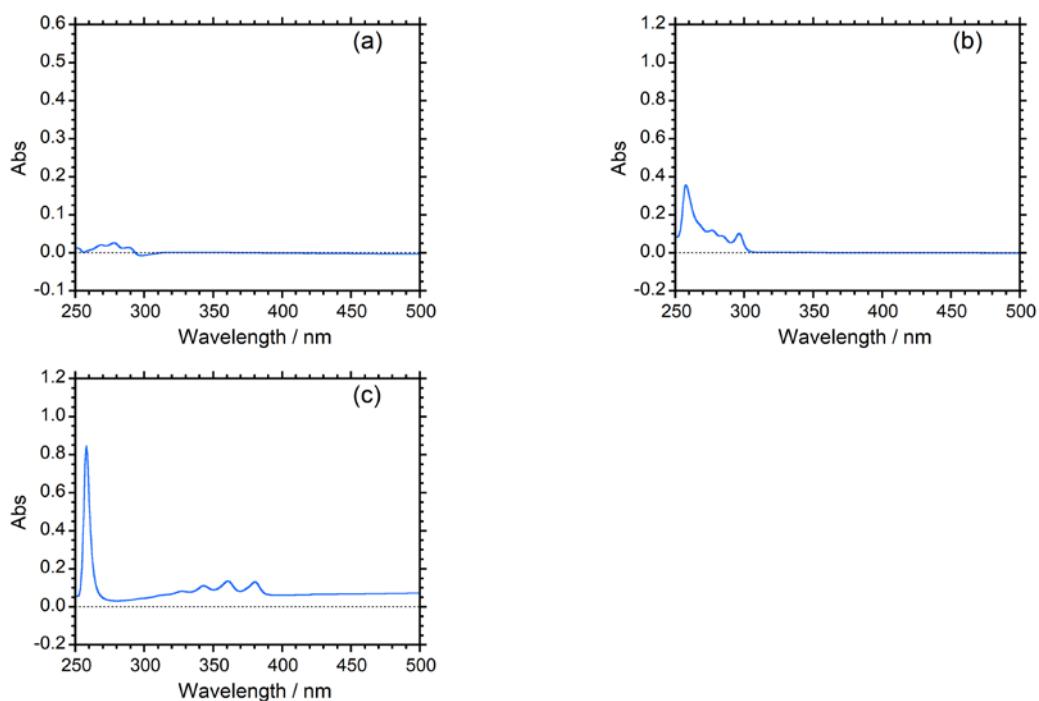

**Fig. S1.** UV-Vis spectra of (a) NP in DMSO ( $1.0 \times 10^{-5}$  M), (b) PHE in DMSO ( $1.0 \times 10^{-5}$  M) and (c) ANT in DMSO ( $1.0 \times 10^{-5}$  M).

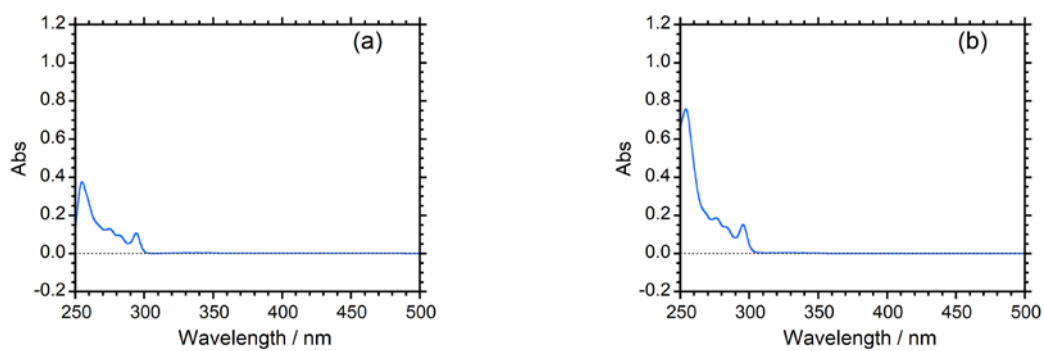

**Fig. S2.** UV-Vis spectra of (a) PHE in THF ( $1.0 \times 10^{-5}$  M) and (b) PHE in CHCl<sub>3</sub> ( $1.0 \times 10^{-5}$  M).

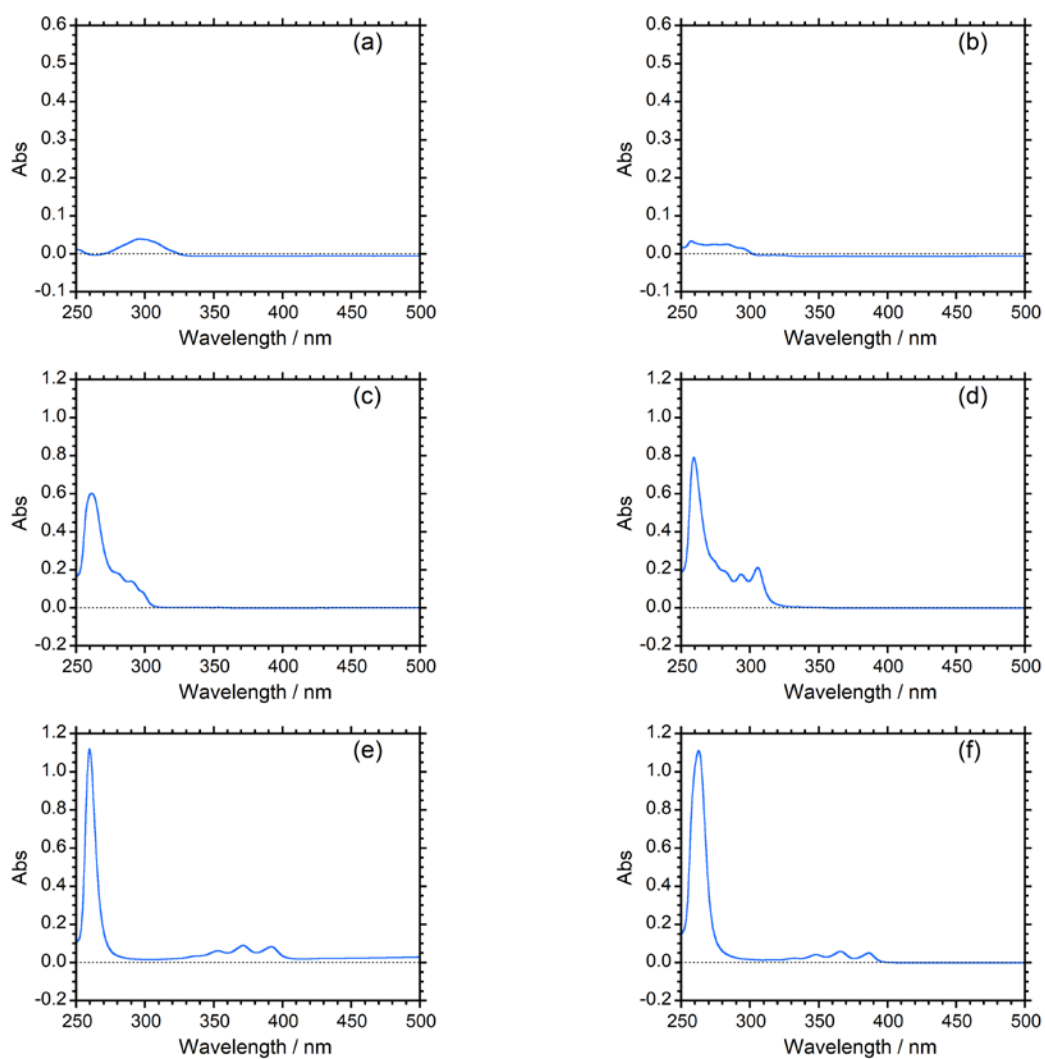

**Fig. S3.** UV-Vis spectra of (a) **NP-1** in DMSO ( $1.0 \times 10^{-5}$  M), (b) **NP-2** in DMSO ( $1.0 \times 10^{-5}$  M), (c) **PHE-2** in DMSO ( $1.0 \times 10^{-5}$  M), (d) **PHE-3** in DMSO ( $1.0 \times 10^{-5}$  M), (e) **ANT-1** in DMSO ( $1.0 \times 10^{-5}$  M) and (f) **ANT-2** in DMSO ( $1.0 \times 10^{-5}$  M).

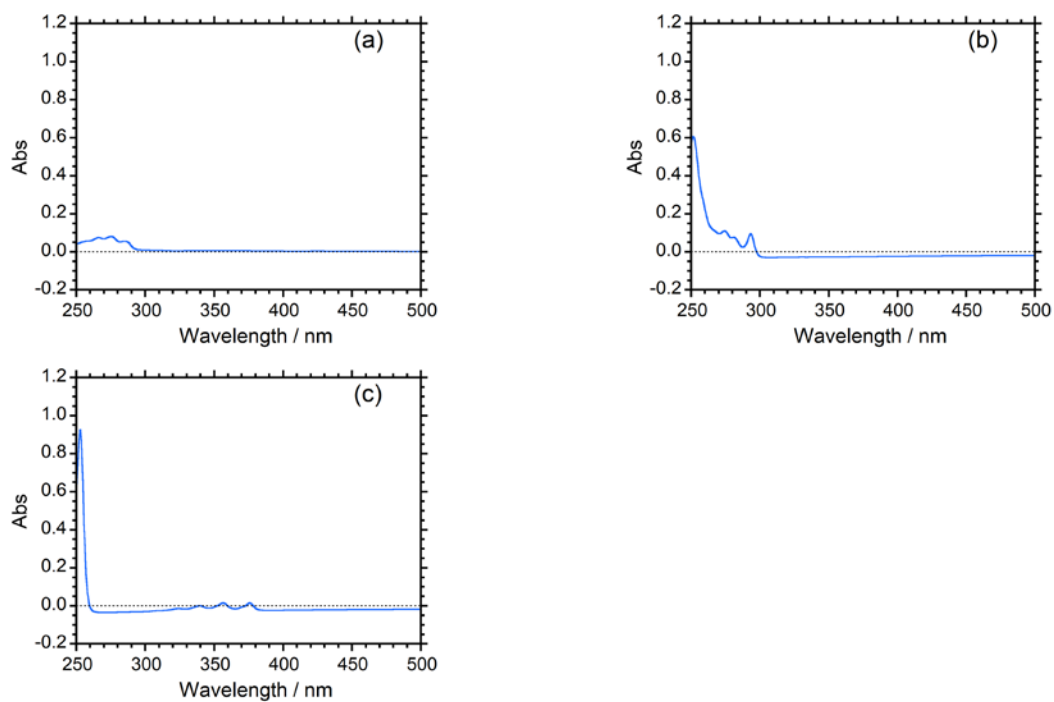

**Fig. S4.** UV-Vis spectra of (a) **NP** in CHX ( $1.0 \times 10^{-5}$  M), (b) **PHE** in CHX ( $1.0 \times 10^{-5}$  M) and (c) **ANT** in CHX ( $1.0 \times 10^{-5}$  M)

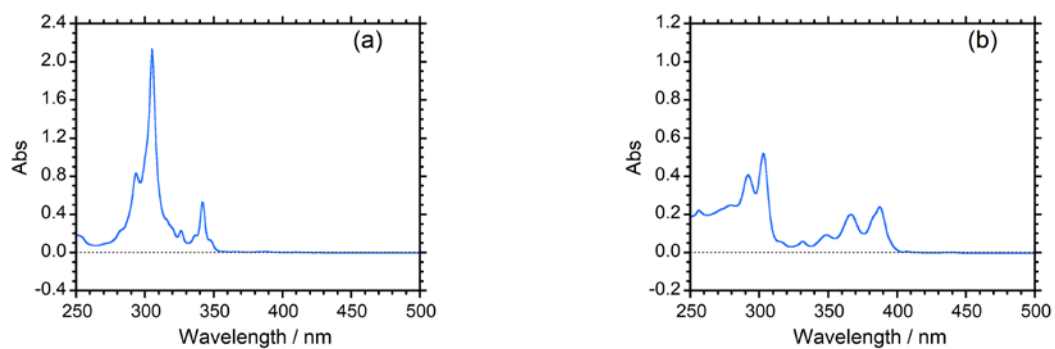

**Fig. S5.** UV-Vis spectra of (a) **COR** in DMSO ( $1.0 \times 10^{-5}$  M) and (b) **BP** in DMSO ( $1.0 \times 10^{-5}$  M).

## 2. MCPL, CPL and PL spectra of PHE in THF, CHCl<sub>3</sub>, and PMMA

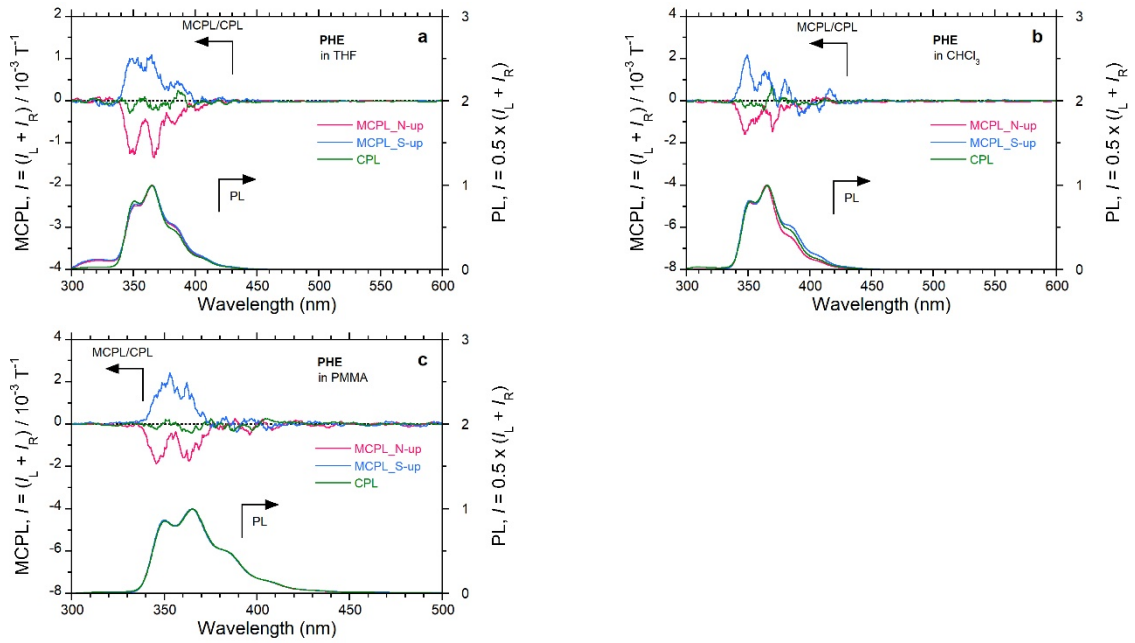

**Fig. S6.** MCPL and PL spectra of PHE in (a) THF, (b) CHCl<sub>3</sub>, and (c) PMMA excited at 270 nm at  $H_0 = 1.6$  T (red and blue lines at N-up and S-up geometry, respectively, associated with CPL spectra at  $H_0 = 0.0$  T (green line) and the corresponding PL spectra.

## 3. G values and PL spectra of NP, NP-2, ANT, ANT-2, PHE, PHE-3, COR, and BP

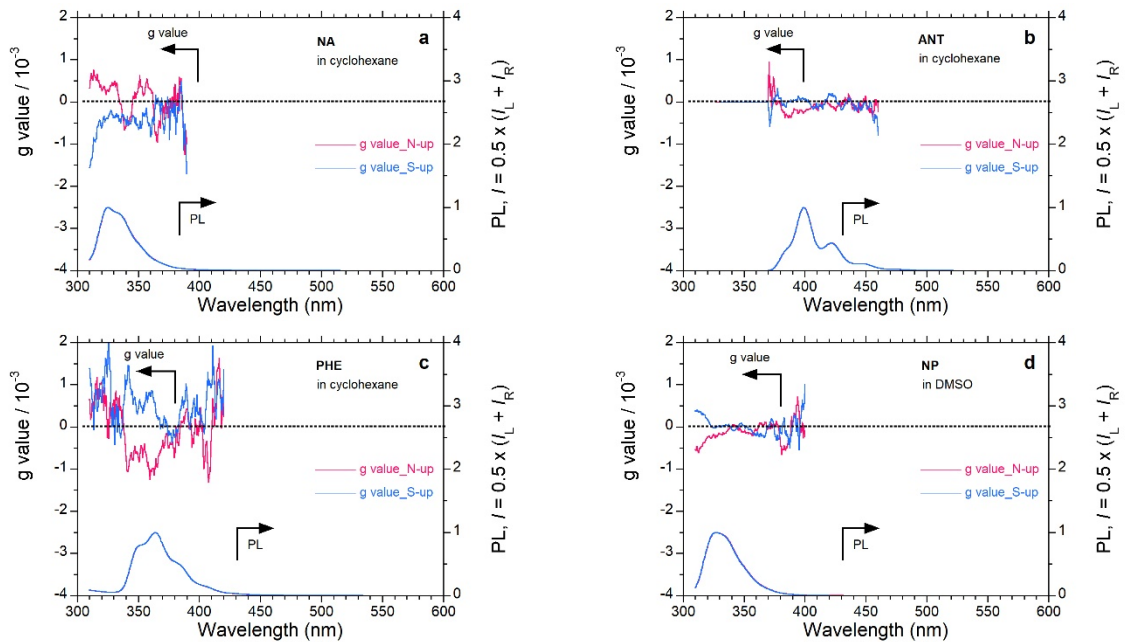

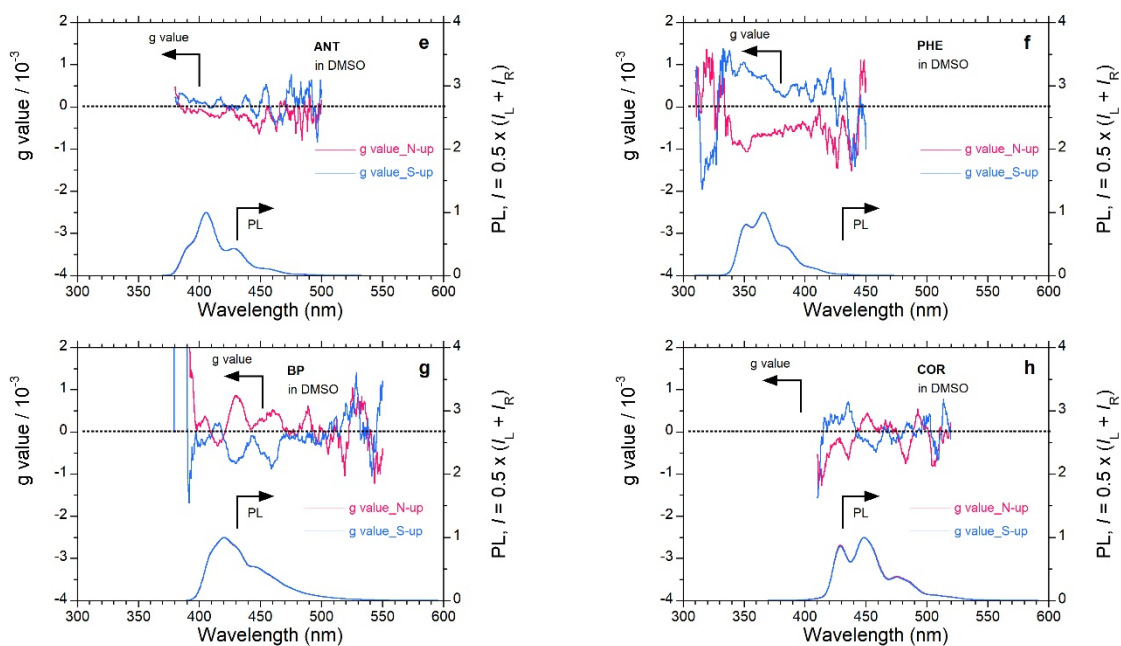

**Fig. S7.** G values and PL spectra of (a) NP in CHX, (b) ANT in CHX, (c) PHE in CHX, (d) NP in DMSO, (e) ANT in DMSO, (f) PHE in DMSO, (g) BP in DMSO and (h) COR in DMSO.

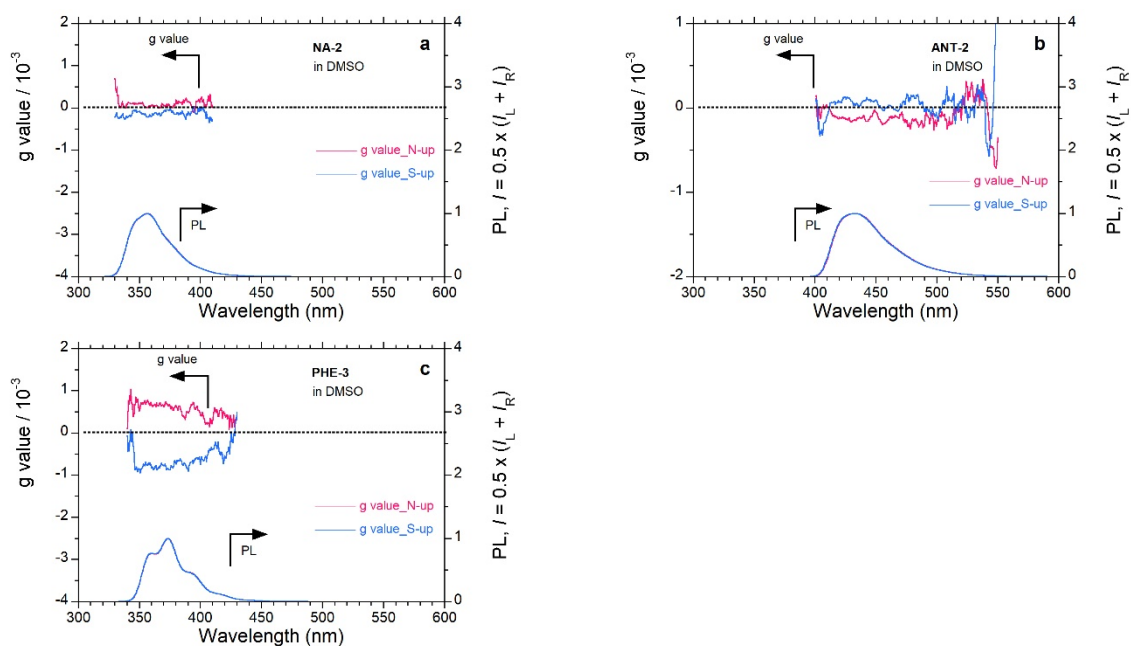

**Fig. S8.** G values and PL spectra of (a) NP-2 in DMSO, (b) ANT-2 in DMSO and (c) PHE-3 in DMSO.
